# Supplementary material
Source: PubMed Central journal article supplement (PMC6792368)
Supplement: ehp-127-087009-s001.pdf [file ehp-127-087009-s001.pdf]

**Note to readers with disabilities:** *EHP* strives to ensure that all journal content is accessible to all readers. However, some figures and Supplemental Material published in *EHP* articles may not conform to [508 standards](#) due to the complexity of the information being presented. If you need assistance accessing journal content, please contact [ehp508@niehs.nih.gov](mailto:ehp508@niehs.nih.gov). Our staff will work with you to assess and meet your accessibility needs within 3 working days.

### **Supplemental Material**

#### **Ambient Air Pollution and the Risk of Atrial Fibrillation and Stroke: A Population-Based Cohort Study**

Saeha Shin, Richard T. Burnett, Jeffrey C. Kwong, Perry Hystad, Aaron van Donkelaar, Jeffrey R. Brook, Mark S. Goldberg, Karen Tu, Ray Copes, Randall V. Martin, Ying Liu, Alexander Kopp, and Hong Chen

#### **Table of Contents**

**Table S1.** Ascertainment of pre-existing comorbidities.

**Table S2.** Mean annual concentrations of PM<sub>2.5</sub>, NO<sub>2</sub>, O<sub>3</sub>, and O<sub>x</sub> at baseline in 2001.

**Table S3.** Hazard ratios (HR) and 95% confidence intervals (CIs) for the incidence of atrial fibrillation and stroke using multi-pollutant models in Ontario, Canada.

**Table S4.** Pearson correlation coefficients for air pollutants during the entire follow-up for cohorts by outcome.

**Table S5.** Hazard ratios (HRs) and 95% confidence intervals (CIs) per interquartile range increment for the analysis of effect modification by selected characteristics for atrial fibrillation.

**Table S6.** Hazard ratios (HRs) and 95% confidence intervals (CIs) per interquartile range increment for the analysis of effect modification by selected characteristics for stroke.

**Table S7.** Ensemble HRs of all models examined in SCHIF for the associations of PM<sub>2.5</sub>, NO<sub>2</sub>, O<sub>3</sub> and O<sub>x</sub> with the incidence of atrial fibrillation and stroke by quartile of exposures.

**Table S8.** Hazard ratios (HR) and 95% confidence intervals (CIs) for the incidence of atrial fibrillation and stroke across quintiles of ambient PM<sub>2.5</sub>, NO<sub>2</sub>, O<sub>3</sub> and O<sub>x</sub> in Ontario, Canada.

**Figure S1.** Pollutant-disease relationships for NO<sub>2</sub> and O<sub>3</sub> with atrial fibrillation.

**Figure S2.** Pollutant-disease relationships for NO<sub>2</sub> and O<sub>3</sub> with stroke.

**References**

## TABLES

**Table S1: Ascertainment of pre-existing comorbidities**

| <b>Condition</b>                               | <b>Validated Database</b>             | <b>Case definition</b>                                                                                                                                                                    | <b>ICD-9 Codes</b> | <b>ICD-10 Codes</b> |
|------------------------------------------------|---------------------------------------|-------------------------------------------------------------------------------------------------------------------------------------------------------------------------------------------|--------------------|---------------------|
| Congestive heart failure (Schultz et al. 2013) | CHF (Congestive Heart Failure)        | At least one hospitalization, or one physician claim or emergency department visit within two years by either a second physician claim or emergency department visit or a hospitalization | 428                | I50                 |
| Coronary heart disease                         | -                                     | At least one hospitalization                                                                                                                                                              | 410-414            | I20-I25             |
| Diabetes (Hux et al. 2002)                     | ODD (Ontario Diabetes Dataset)        | At least one hospitalization, or 2 or more physician claims within a two-year period                                                                                                      | 250                | E10-E14             |
| Hypertension (Tu et al. 2007)                  | HYPHER (Ontario Hypertension Dataset) | At least one hospitalization, or a physician claim followed within two years by either a physician claim or a hospitalization                                                             | 401-405            | I10-I15             |

Note: Congestive heart failure, diabetes, and hypertension cases were obtained from the Institute for Clinical Evaluative Sciences (ICES)-derived cohorts, which were created based on validated, linked disease algorithms.

**Table S2: Mean annual concentrations of PM<sub>2.5</sub>, NO<sub>2</sub>, O<sub>3</sub>, and O<sub>x</sub> at baseline in 2001**

|                                   | <b>Air Pollutant</b>                           |                                 |                            |                                |
|-----------------------------------|------------------------------------------------|---------------------------------|----------------------------|--------------------------------|
|                                   | <b>PM<sub>2.5</sub><br/>(µg/m<sup>3</sup>)</b> | <b>NO<sub>2</sub><br/>(ppb)</b> | <b>O<sub>3</sub> (ppb)</b> | <b>O<sub>x</sub><br/>(ppb)</b> |
| Mean annual concentration<br>(SD) | 9.8 (2.9)                                      | 15.3 (8.0)                      | 45.8<br>(4.2)              | 35.7<br>(3.5)                  |
| Interquartile range               | 4.0                                            | 12.9                            | 6.1                        | 3.7                            |
| Percentiles                       |                                                |                                 |                            |                                |
| Minimum                           | 1.0                                            | 1.2                             | 14.3                       | 10.7                           |
| 25 <sup>th</sup>                  | 8.0                                            | 8.4                             | 42.7                       | 34.2                           |
| 50 <sup>th</sup>                  | 10.1                                           | 14.1                            | 46.4                       | 36.7                           |
| 75 <sup>th</sup>                  | 11.9                                           | 21.3                            | 48.9                       | 37.9                           |
| Maximum                           | 20.0                                           | 67.0                            | 63.3                       | 50.7                           |

**Table S3: Hazard ratios (HR) and 95% confidence intervals (CIs) for the incidence of atrial fibrillation and stroke using multi-pollutant models in Ontario, Canada**

|                               | HR (95% CI)         |                     |
|-------------------------------|---------------------|---------------------|
|                               | Stroke              | Atrial Fibrillation |
| <b>Two-pollutant models</b>   |                     |                     |
| 1. PM <sub>2.5</sub>          | 1.045 (1.032-1.059) | 1.025 (1.017-1.034) |
| NO <sub>2</sub>               | 1.008 (0.985-1.032) | 0.997 (0.982-1.012) |
| 2. PM <sub>2.5</sub>          | 1.030 (1.018-1.043) | 1.022 (1.014-1.030) |
| O <sub>3</sub>                | 1.041 (1.028-1.054) | 1.003 (0.995-1.011) |
| 3. PM <sub>2.5</sub>          | 1.019 (1.005-1.033) | 1.022 (1.013-1.031) |
| O <sub>x</sub>                | 1.039 (1.028-1.051) | 1.002 (0.994-1.009) |
| 4. NO <sub>2</sub>            | 1.050 (1.028-1.073) | 1.017 (1.003-1.030) |
| O <sub>3</sub>                | 1.054 (1.041-1.066) | 1.011 (1.003-1.018) |
| <b>Three-pollutant models</b> |                     |                     |
| 1. PM <sub>2.5</sub>          | 1.021 (1.007-1.036) | 1.023 (1.014-1.032) |
| NO <sub>2</sub>               | 1.031 (1.007-1.057) | 0.997 (0.982-1.013) |
| O <sub>3</sub>                | 1.045 (1.032-1.059) | 1.002 (0.994-1.011) |

Note: We adjusted for all covariates in the main model, which was stratified by a dichotomous indicator for residing in the Greater Toronto Area (GTA) or outside the GTA; adjusted for four area-level variables at dissemination area level (income quintile, proportion of individuals with less than high school education, unemployment rate, and proportion of recent immigrants who obtained landed immigrant or permanent residency status within five years of Canadian census); and included two geographic indicators (i.e., northern/southern Ontario and urban/rural areas). The associations are reported per interquartile range of PM<sub>2.5</sub> (4.8 µg/m<sup>3</sup>), NO<sub>2</sub> (12.5 ppb), O<sub>3</sub> (6.7 ppb), and O<sub>x</sub> (3.7 ppb).

**Table S4: Pearson correlation coefficients for air pollutants during the entire follow-up for cohorts by outcome**

|                            | <b>PM<sub>2.5</sub></b> | <b>NO<sub>2</sub></b> | <b>O<sub>3</sub></b> | <b>O<sub>x</sub></b> |
|----------------------------|-------------------------|-----------------------|----------------------|----------------------|
| <b>Stroke</b>              |                         |                       |                      |                      |
| PM <sub>2.5</sub>          | 1.000                   | 0.656                 | 0.275                | 0.668                |
| NO <sub>2</sub>            | -                       | 1.000                 | -0.127               | 0.579                |
| O <sub>3</sub>             | -                       | -                     | 1.000                | 0.735                |
| O <sub>x</sub>             | -                       | -                     | -                    | 1.000                |
| <b>Atrial Fibrillation</b> |                         |                       |                      |                      |
| PM <sub>2.5</sub>          | 1.000                   | 0.655                 | 0.276                | 0.668                |
| NO <sub>2</sub>            | -                       | 1.000                 | -0.127               | 0.579                |
| O <sub>3</sub>             | -                       | -                     | 1.000                | 0.735                |
| O <sub>x</sub>             | -                       | -                     | -                    | -                    |

Note: All correlation coefficients have  $p < .0001$ .

**Table S5: Hazard ratios (HRs) and 95% confidence intervals (CIs) per interquartile range increment for the analysis of effect modification by selected characteristics for atrial fibrillation**

|                        | HR (95% CI)       |                  |                  |                  |
|------------------------|-------------------|------------------|------------------|------------------|
|                        | PM <sub>2.5</sub> | NO <sub>2</sub>  | O <sub>3</sub>   | O <sub>x</sub>   |
| <b>Sex</b>             |                   |                  |                  |                  |
| Male                   | 1.03 (1.01-1.04)  | 1.01 (1.00-1.03) | 1.01 (1.00-1.02) | 1.01 (1.00-1.02) |
| Female                 | 1.03 (1.01-1.04)  | 1.03 (1.01-1.05) | 1.01 (1.00-1.02) | 1.01 (1.00-1.02) |
| <i>P</i>               | 1                 | 0.115            | 1                | 1                |
| <b>Age</b>             |                   |                  |                  |                  |
| 35-44                  | 1.03 (1.00-1.07)  | 1.04 (0.98-1.10) | 1.05 (1.01-1.09) | 1.05 (1.00-1.09) |
| 45-54                  | 1.01 (0.98-1.05)  | 1.01 (0.97-1.06) | 1.03 (1.00-1.05) | 1.02 (1.00-1.04) |
| 55-64                  | 1.04 (1.00-1.07)  | 1.02 (0.99-1.04) | 1.01 (1.00-1.03) | 1.01 (1.00-1.02) |
| 65-74                  | 1.04 (1.02-1.06)  | 1.03 (1.01-1.05) | 1.01 (1.00-1.03) | 1.01 (1.00-1.03) |
| 75-85                  | 1.02 (1.00-1.05)  | 1.04 (1.00-1.07) | 0.99 (0.97-1.01) | 1.00 (0.98-1.02) |
| <i>P</i>               | 0.736             | 0.862            | 0.027            | 0.292            |
| <b>Income Quintile</b> |                   |                  |                  |                  |
| Q1 (Lowest)            | 1.06 (1.04-1.08)  | 1.03 (1.00-1.06) | 1.00 (0.99-1.02) | 1.00 (0.99-1.02) |
| Q2                     | 1.05 (1.03-1.07)  | 1.04 (1.02-1.07) | 1.02 (1.00-1.03) | 1.02 (1.01-1.03) |
| Q3                     | 1.02 (1.00-1.04)  | 1.01 (0.99-1.04) | 1.00 (0.97-1.03) | 1.00 (0.98-1.02) |
| Q4                     | 1.02 (1.01-1.04)  | 1.03 (1.01-1.06) | 1.02 (0.99-1.04) | 1.02 (1.00-1.04) |
| Q5 (Highest)           | 0.99 (0.97-1.02)  | 1.02 (0.97-1.07) | 1.03 (1.00-1.06) | 1.02 (1.00-1.05) |
| <i>P</i>               | <0.001            | 0.488            | 0.453            | 0.129            |
| <b>Hypertension</b>    |                   |                  |                  |                  |
| Yes                    | 1.03 (1.02-1.04)  | 1.03 (1.01-1.05) | 1.01 (1.00-1.02) | 1.01 (1.00-1.02) |
| No                     | 1.02 (1.01-1.04)  | 1.02 (1.00-1.03) | 1.04 (1.01-1.06) | 1.02 (1.00-1.03) |
| <i>P</i>               | 0.276             | 0.433            | 0.028            | 0.278            |
| <b>Diabetes</b>        |                   |                  |                  |                  |
| Yes                    | 1.02 (1.01-1.04)  | 1.04 (1.01-1.06) | 1.00 (0.98-1.02) | 1.01 (0.99-1.02) |
| No                     | 1.04 (1.01-1.06)  | 1.01 (1.00-1.03) | 1.01 (1.00-1.03) | 1.01 (1.01-1.02) |
| <i>P</i>               | 0.178             | 0.043            | 0.433            | 1                |
| <b>CHD</b>             |                   |                  |                  |                  |
| Yes                    | 1.05 (1.03-1.07)  | 1.05 (1.02-1.08) | 0.99 (0.98-1.01) | 1.01 (0.99-1.02) |
| No                     | 1.02 (1.01-1.04)  | 1.02 (1.00-1.03) | 1.01 (1.00-1.02) | 1.01 (1.00-1.02) |
| <i>P</i>               | 0.018             | 0.077            | 0.030            | 1                |

Note: HR, hazard ratio; 95% CI, 95% confidence interval; CHD, coronary heart disease. We performed Cochran's Q to assess statistically significant heterogeneity between subgroups within the study. Associations are reported per interquartile range of PM<sub>2.5</sub> (4.8 µg/m<sup>3</sup>), NO<sub>2</sub> (12.5 ppb), O<sub>3</sub> (6.7 ppb), and O<sub>x</sub> (3.7 ppb).

**Table S6: Hazard ratios (HRs) and 95% confidence intervals (CIs) per interquartile range increment for the analysis of effect modification by selected characteristics for stroke**

|                        | HR (95% CI)       |                  |                  |                  |
|------------------------|-------------------|------------------|------------------|------------------|
|                        | PM <sub>2.5</sub> | NO <sub>2</sub>  | O <sub>3</sub>   | O <sub>x</sub>   |
| <b>Sex</b>             |                   |                  |                  |                  |
| Male                   | 1.04 (1.02-1.06)  | 1.03 (1.00-1.06) | 1.04 (1.02-1.06) | 1.04 (1.03-1.06) |
| Female                 | 1.06 (1.04-1.08)  | 1.05 (1.02-1.07) | 1.06 (1.04-1.07) | 1.05 (1.04-1.07) |
| <i>P</i>               | 0.166             | 0.019            | 0.119            | 0.353            |
| <b>Age</b>             |                   |                  |                  |                  |
| 35-44                  | 1.04 (1.00-1.09)  | 1.07 (1.00-1.14) | 1.02 (0.98-1.07) | 1.03 (1.00-1.07) |
| 45-54                  | 1.08 (1.03-1.13)  | 1.07 (0.99-1.16) | 1.03 (0.99-1.08) | 1.05 (1.01-1.10) |
| 55-64                  | 1.06 (1.02-1.11)  | 1.04 (0.99-1.09) | 1.06 (1.02-1.10) | 1.05 (1.03-1.08) |
| 65-74                  | 1.04 (1.01-1.07)  | 1.01 (0.97-1.04) | 1.06 (1.03-1.08) | 1.04 (1.02-1.06) |
| 75-85                  | 1.03 (1.00-1.05)  | 1.03 (1.00-1.06) | 1.06 (1.03-1.09) | 1.05 (1.02-1.08) |
| <i>P</i>               | 0.335             | 0.431            | 0.654            | 0.876            |
| <b>Income Quintile</b> |                   |                  |                  |                  |
| Q1 (Lowest)            | 1.08 (1.04-1.12)  | 1.08 (1.05-1.12) | 1.02 (1.00-1.05) | 1.04 (1.01-1.06) |
| Q2                     | 1.08 (1.05-1.11)  | 1.05 (0.99-1.11) | 1.07 (1.02-1.12) | 1.07 (1.05-1.09) |
| Q3                     | 1.04 (1.00-1.08)  | 1.05 (1.00-1.11) | 1.05 (1.02-1.07) | 1.05 (1.02-1.08) |
| Q4                     | 1.01 (0.99-1.04)  | 0.98 (0.94-1.02) | 1.03 (1.00-1.06) | 1.02 (1.00-1.04) |
| Q5 (Highest)           | 1.01 (0.99-1.04)  | 1.01 (0.97-1.06) | 1.08 (1.05-1.11) | 1.06 (1.04-1.09) |
| <i>P</i>               | 0.001             | 0.001            | 0.038            | 0.010            |
| <b>Stroke Subtype</b>  |                   |                  |                  |                  |
| Ischemic               | 1.06 (1.04-1.08)  | 1.04 (1.01-1.07) | 1.06 (1.04-1.07) | 1.05 (1.04-1.06) |
| Hemorrhagic            | 1.04 (1.01-1.07)  | 1.06 (1.01-1.10) | 1.02 (0.99-1.05) | 1.03 (1.00-1.05) |
| <i>P</i>               | 0.279             | 0.469            | 0.021            | 0.150            |
| <b>Hypertension</b>    |                   |                  |                  |                  |
| Yes                    | 1.05 (1.03-1.07)  | 1.04 (1.02-1.07) | 1.06 (1.04-1.08) | 1.05 (1.03-1.07) |
| No                     | 1.05 (1.02-1.07)  | 1.04 (1.00-1.07) | 1.04 (1.02-1.06) | 1.04 (1.03-1.06) |
| <i>P</i>               | 1                 | 1                | 0.166            | 0.432            |
| <b>Diabetes</b>        |                   |                  |                  |                  |
| Yes                    | 1.06 (1.03-1.09)  | 1.04 (1.01-1.08) | 1.07 (1.04-1.10) | 1.06 (1.04-1.09) |
| No                     | 1.05 (1.03-1.07)  | 1.03 (1.00-1.06) | 1.05 (1.03-1.06) | 1.04 (1.03-1.06) |
| <i>P</i>               | 0.586             | 0.670            | 0.240            | 0.175            |
| <b>CHD</b>             |                   |                  |                  |                  |
| Yes                    | 1.05 (1.01-1.10)  | 1.02 (0.96-1.08) | 1.06 (1.03-1.10) | 1.05 (1.02-1.08) |
| No                     | 1.05 (1.03-1.07)  | 1.04 (1.01-1.06) | 1.05 (1.03-1.06) | 1.05 (1.04-1.06) |
| <i>P</i>               | 1                 | 0.550            | 0.605            | 1                |



Note: HR, hazard ratio; 95% CI, 95% confidence interval; CHD, coronary heart disease. We performed Cochran's Q to assess statistically significant heterogeneity between subgroups within the study. Associations are reported per interquartile range of PM<sub>2.5</sub> (4.8 µg/m<sup>3</sup>), NO<sub>2</sub> (12.5 ppb), O<sub>3</sub> (6.7 ppb), and O<sub>x</sub> (3.7 ppb).

**Table S7: Ensemble HRs of all models examined in SCHIF for the associations of PM<sub>2.5</sub>, NO<sub>2</sub>, O<sub>3</sub> and O<sub>x</sub> with the incidence of atrial fibrillation and stroke by quartile of exposures**

|                                              | Q1               | Q2               | Q3               | Q4               |
|----------------------------------------------|------------------|------------------|------------------|------------------|
| <b>AF</b>                                    |                  |                  |                  |                  |
| PM <sub>2.5</sub> range (µg/m <sup>3</sup> ) | 6.5-3.4          | 8.7-6.5          | 10.6-8.7         | 14.6-10.6        |
| HR (95% CI)                                  | 1.00 (0.98-1.02) | 1.00 (0.97-1.03) | 1.01 (0.97-1.05) | 1.03 (0.98-1.08) |
| NO <sub>2</sub> range (ppb)                  | 6.9-3.1          | 11.3-6.9         | 17.4-11.3        | 31.4-17.4        |
| HR (95% CI)                                  | 1.02 (0.99-1.04) | 1.02 (0.98-1.05) | 1.02 (0.98-1.06) | 1.03 (0.98-1.07) |
| O <sub>3</sub> range (ppb)                   | 43.8-33.2        | 47.5-43.8        | 49.9-47.5        | 55.6-49.9        |
| HR (95% CI)                                  | 1.01 (0.99-1.03) | 1.01 (0.98-1.04) | 1.00 (0.97-1.04) | 1.01 (0.97-1.06) |
| O <sub>x</sub> range (ppb)                   | 33.9-24.0        | 36.2-33.9        | 37.9-36.2        | 41.6-37.9        |
| HR (95% CI)                                  | 1.01 (0.98-1.04) | 1.00 (0.96-1.05) | 1.01 (0.96-1.05) | 1.02 (0.97-1.07) |
| <b>Stroke</b>                                |                  |                  |                  |                  |
| PM <sub>2.5</sub> range (µg/m <sup>3</sup> ) | 6.5-3.4          | 8.7-6.5          | 10.6-8.7         | 14.6-10.6        |
| HR (95% CI)                                  | 1.03 (1.00-1.07) | 1.02 (0.98-1.07) | 1.02 (0.98-1.07) | 1.04 (0.98-1.10) |
| NO <sub>2</sub> range (ppb)                  | 6.9-3.1          | 11.3-6.9         | 17.3-11.3        | 31.4-17.3        |
| HR (95% CI)                                  | 1.03 (1.00-1.07) | 1.02 (0.98-1.07) | 1.02 (0.97-1.07) | 1.03 (0.97-1.09) |
| O <sub>3</sub> range (ppb)                   | 43.8-33.2        | 47.5-43.8        | 49.9-47.5        | 55.6-49.9        |
| HR (95% CI)                                  | 1.07 (1.01-1.12) | 1.01 (0.95-1.08) | 1.01 (0.94-1.08) | 1.01 (0.93-1.10) |
| O <sub>x</sub> range (ppb)                   | 33.9-24.0        | 36.2-33.9        | 37.9-36.2        | 41.6-37.9        |
| HR (95% CI)                                  | 1.04 (0.97-1.11) | 1.02 (0.91-1.13) | 1.02 (0.90-1.15) | 1.05 (0.91-1.20) |

Note: HR, hazard ratio; CI, confidence interval; Q1, lowest quartile (25th vs. 1st percentiles); Q2, second quartile (50th vs. 25th percentiles); Q3, third quartile (75th vs. 50th percentiles); Q4, highest quartile (99th vs. 75th percentiles); and CI, confidence interval. Associations are reported based on the highest to lowest percentile in each quartile; for example, HR (95% CI) of 1.003 (0.985-1.022) is for PM<sub>2.5</sub> at 6.5 µg/m<sup>3</sup> with 3.4 µg/m<sup>3</sup> as the reference.

**Table S8: Hazard ratios (HR) and 95% confidence intervals (CIs) for the incidence of atrial fibrillation and stroke across quintiles of ambient PM<sub>2.5</sub>, NO<sub>2</sub>, O<sub>3</sub> and O<sub>x</sub> in Ontario, Canada**

|               | HR (95% CI)       |                  |                  |                  |
|---------------|-------------------|------------------|------------------|------------------|
|               | PM <sub>2.5</sub> | NO <sub>2</sub>  | O <sub>3</sub>   | O <sub>x</sub>   |
| <b>AF</b>     |                   |                  |                  |                  |
| Q1 (Lowest)   | -                 | -                | -                | -                |
| Q2            | 1.01 (1.00-1.02)  | 1.02 (1.00-1.03) | 0.99 (0.97-1.00) | 1.02 (1.01-1.03) |
| Q3            | 1.02 (1.01-1.03)  | 1.03 (1.02-1.04) | 1.00 (0.98-1.01) | 1.01 (1.00-1.02) |
| Q4            | 1.02 (1.01-1.04)  | 1.05 (1.03-1.07) | 1.01 (1.00-1.02) | 1.02 (1.00-1.03) |
| Q5 (Highest)  | 1.05 (1.03-1.06)  | 1.04 (1.02-1.06) | 1.02 (1.01-1.04) | 1.04 (1.02-1.05) |
| <i>P</i>      | <0.001            | 0.02             | 0.001            | 0.128            |
| <b>Stroke</b> |                   |                  |                  |                  |
| Q1 (Lowest)   | -                 | -                | -                | -                |
| Q2            | 1.03 (1.01-1.05)  | 1.03 (1.01-1.05) | 1.03 (1.01-1.05) | 1.04 (1.02-1.06) |
| Q3            | 1.05 (1.02-1.07)  | 1.02 (1.00-1.05) | 1.10 (1.07-1.12) | 1.05 (1.03-1.08) |
| Q4            | 1.05 (1.02-1.07)  | 1.06 (1.03-1.08) | 1.10 (1.07-1.12) | 1.06 (1.04-1.09) |
| Q5 (Highest)  | 1.08 (1.05-1.10)  | 1.06 (1.03-1.10) | 1.10 (1.07-1.13) | 1.12 (1.10-1.15) |
| <i>P</i>      | 0.025             | 0.137            | <0.001           | <0.001           |

Note: Q1 was the reference level. We performed Cochran's Q to assess statistically significant heterogeneity between subgroups within the study.

## FIGURES

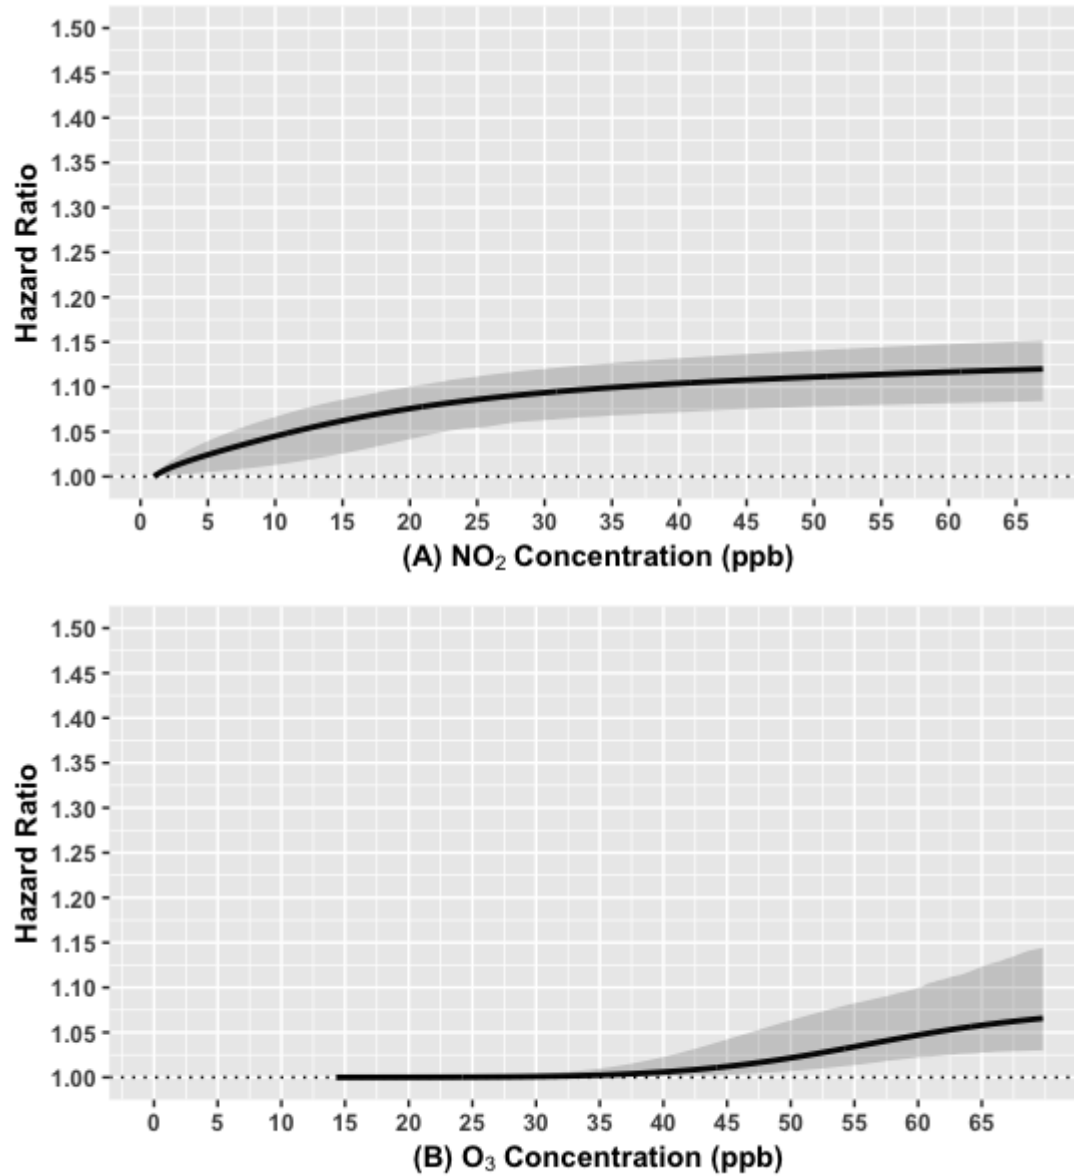

**Figure S1: Pollutant-disease relationships for NO<sub>2</sub> and O<sub>3</sub> with atrial fibrillation**

Grey area represents the 95% confidence interval. Fully adjusted model, stratified by an indicator for living in the Greater Toronto Area or not, and adjusted for age, sex, area-level socioeconomic status (education, recent immigrants, unemployment rate, and income quintile), urban/rural area, and northern/southern Ontario.

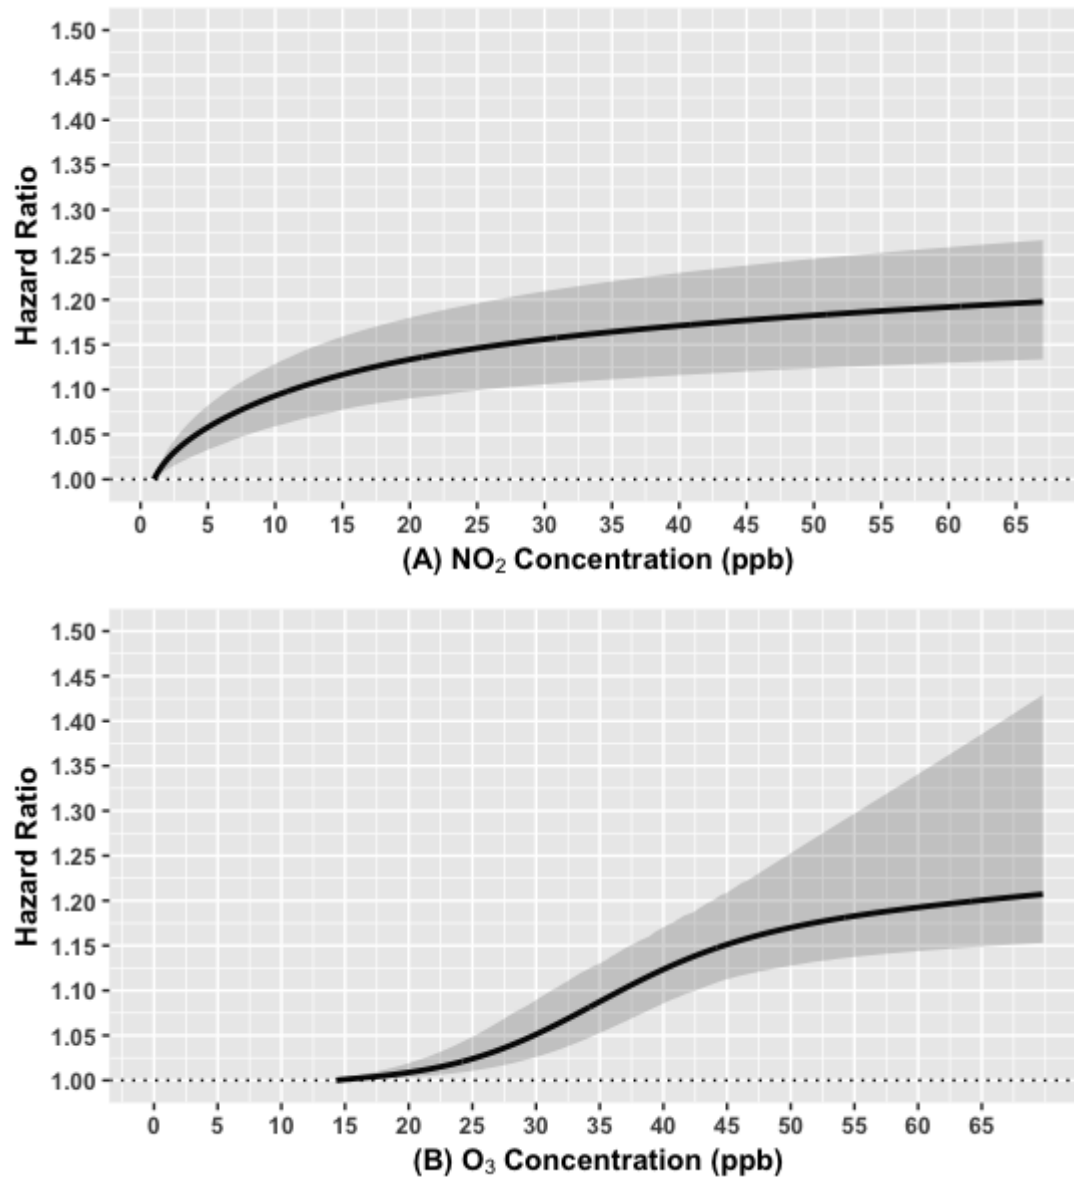

**Figure S2: Pollutant-disease relationships for NO<sub>2</sub> and O<sub>3</sub> with stroke**

Grey area represents the 95% confidence interval. Fully adjusted model, stratified by an indicator for living in the Greater Toronto Area or not, and adjusted for age, sex, area-level socioeconomic status (education, recent immigrants, unemployment rate, and income quintile), urban/rural area, and northern/southern Ontario.

## References

- Hux JE, Ivis F, Flintoft V, Bica A. 2002. Diabetes in Ontario: Determination of prevalence and incidence using a validated administrative data algorithm. *Diabetes Care* 25:512–516; doi:10.2337/diacare.25.3.512.
- Schultz SE, Rothwell DM, Chen Z, Tu K. 2013. Identifying cases of congestive heart failure from administrative data: a validation study using primary care patient records. *Chronic Diseases Inj. Canada* 33: 160–166.
- Tu K, Campbell NR, Chen Z-L, Cauch-Dudek KJ, McAlister FA. 2007. Accuracy of administrative databases in identifying patients with hypertension. *Open Med.* 1: e18-26.
