# Supplementary material
Source: PubMed Central journal article supplement (PMC6792368)
Supplement: ehp-127-087009-s002.pdf [file ehp-127-087009-s002.pdf]

**Note to readers with disabilities:** *EHP* strives to ensure that all journal content is accessible to all readers. However, some figures and Supplemental Material published in *EHP* articles may not conform to [508 standards](#) due to the complexity of the information being presented. If you need assistance accessing journal content, please contact [ehp508@niehs.nih.gov](mailto:ehp508@niehs.nih.gov). Our staff will work with you to assess and meet your accessibility needs within 3 working days.

### **Supplemental Material**

#### **Ambient Air Pollution and the Risk of Atrial Fibrillation and Stroke: A Population-Based Cohort Study**

Saeha Shin, Richard T. Burnett, Jeffrey C. Kwong, Perry Hystad, Aaron van Donkelaar, Jeffrey R. Brook, Mark S. Goldberg, Karen Tu, Ray Copes, Randall V. Martin, Ying Liu, Alexander Kopp, and Hong Chen

#### **Table of Contents**

**Table S1.** Ascertainment of pre-existing comorbidities.

**Table S2.** Mean annual concentrations of PM<sub>2.5</sub>, NO<sub>2</sub>, O<sub>3</sub>, and O<sub>x</sub> at baseline in 2001.

**Table S3.** Hazard ratios (HR) and 95% confidence intervals (CIs) for the incidence of atrial fibrillation and stroke using multi-pollutant models in Ontario, Canada.

**Table S4.** Pearson correlation coefficients for air pollutants during the entire follow-up for cohorts by outcome.

**Table S5.** Hazard ratios (HRs) and 95% confidence intervals (CIs) per interquartile range increment for the analysis of effect modification by selected characteristics for atrial fibrillation.

**Table S6.** Hazard ratios (HRs) and 95% confidence intervals (CIs) per interquartile range increment for the analysis of effect modification by selected characteristics for stroke.

**Table S7.** Ensemble HRs of all models examined in SCHIF for the associations of PM<sub>2.5</sub>, NO<sub>2</sub>, O<sub>3</sub> and O<sub>x</sub> with the incidence of atrial fibrillation and stroke by quartile of exposures.

**Table S8.** Hazard ratios (HR) and 95% confidence intervals (CIs) for the incidence of atrial fibrillation and stroke across quintiles of ambient PM<sub>2.5</sub>, NO<sub>2</sub>, O<sub>3</sub> and O<sub>x</sub> in Ontario, Canada.

**Figure S1.** Pollutant-disease relationships for NO<sub>2</sub> and O<sub>3</sub> with atrial fibrillation.

**Figure S2.** Pollutant-disease relationships for NO<sub>2</sub> and O<sub>3</sub> with stroke.

**References**
